# Supplementary material for: Measuring the global disease burden of polycystic ovary syndrome in 194 countries: Global Burden of Disease Study 2017
Source: PubMed Central journal article supplement — Hum Reprod. 2021 Jan 27;36(4):1108–19. doi: 10.1093/humrep/deaa371 (PMC7970729; doi:10.1093/humrep/deaa371), 2021-01-27
Supplement: deaa371_supplementary_figures1.pdf [file deaa371_supplementary_figures1.pdf]

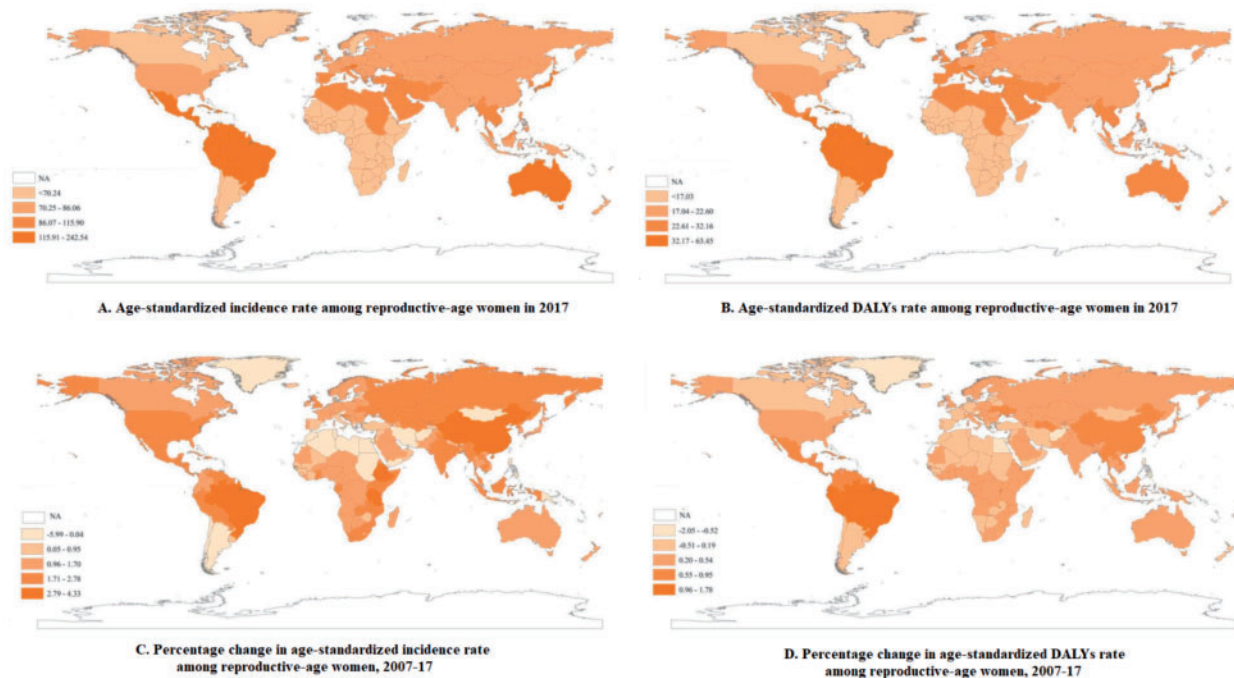

**Supplementary Figure S1.** Age-standardized rates of incidence and DALYs among women of reproductive age (15-49) in 2017, percentage change in age-standardized rate of incidence and DALYs among women of reproductive age for polycystic ovary syndrome (PCOS) during 2007 to 2017 in 194 countries. Age standardized incidence rate (A), DALYs (B) in 2017; Percentage change in age-standardized incidence rate (C), DALYs (D) during 2007–2017. DALYs, disability-adjusted life-years.
