# Supplementary material for: Measuring the global disease burden of polycystic ovary syndrome in 194 countries: Global Burden of Disease Study 2017
Source: PubMed Central journal article supplement — Hum Reprod. 2021 Jan 27;36(4):1108–19. doi: 10.1093/humrep/deaa371 (PMC7970729; doi:10.1093/humrep/deaa371), 2021-01-27
Supplement: deaa371_supplementary_figures2.pdf [file deaa371_supplementary_figures2.pdf]

human reproduction **SUPPLEMENTARY DATA**

**A. Incidence**

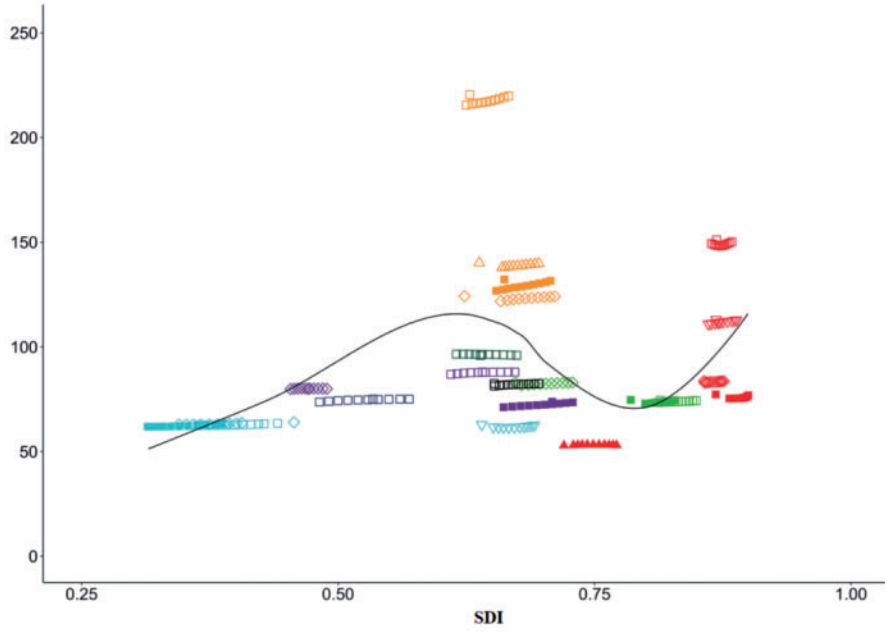

- Global
- High-income Asia Pacific
- High-income North America
- ◇ Western Europe
- ▽ Australasia
- ▲ Southern Latin America
- Andean Latin America
- Tropical Latin America
- ◇ Central Latin America
- △ Caribbean
- Central Europe
- Eastern Europe
- ◇ Central Asia
- North Africa and Middle East
- South Asia
- Southeast Asia
- East Asia
- ◇ Oceania
- Western Sub-Saharan Africa
- Eastern Sub-Saharan Africa
- ◇ Central Sub-Saharan Africa
- ▽ Southern Sub-Saharan Africa

**B. DALYs**

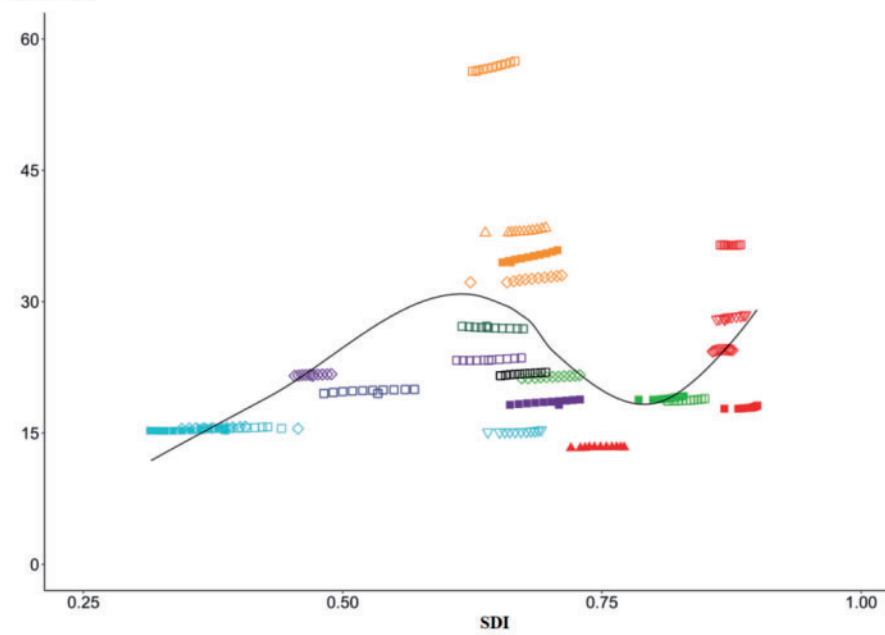

- Global
- High-income Asia Pacific
- High-income North America
- ◇ Western Europe
- ▽ Australasia
- ▲ Southern Latin America
- Andean Latin America
- Tropical Latin America
- ◇ Central Latin America
- △ Caribbean
- Central Europe
- Eastern Europe
- ◇ Central Asia
- North Africa and Middle East
- South Asia
- Southeast Asia
- East Asia
- ◇ Oceania
- Western Sub-Saharan Africa
- Eastern Sub-Saharan Africa
- ◇ Central Sub-Saharan Africa
- ▽ Southern Sub-Saharan Africa

**Supplementary Figure S2.** Age-standardized rate by SDI and world regions during 2007–2017. Incidence rate **(A)** and DALYs rate **(B)**.
